# Supplementary material for: Porcine cis-acting lnc-CAST positively regulates CXCL8 expression through histone H3K27ac
Source: Springer Nature journal article supplement (doi:10.1186/s13567-024-01296-9), 2024-05-07
Supplement: MOESM1 [file 13567_2024_1296_MOESM1_ESM.pdf]

| <b>Primer</b>  | <b>Sequence (5'-3')</b>      |
|----------------|------------------------------|
| Lnc-CAST-F     | CATGTAAGTAATTTCAAAGTGAT      |
| Lnc-CAST-R     | ATAAGTGAATAAATTACACTTG       |
| 5'-RACE-GSP/R  | AGCTCACTGTTGCTGCTAATTTCTTTGT |
| 5'-RACE-NGSP/R | AACATCCTTTTGCCATTCAGGTCATGGT |
| 3'-RACE-GSP/F  | GAGCTTCTTGTACTTGTAATTGGGAGGT |
| 3'-RACE-NGSP/F | CTCCCTCTCAATCTCAGAAGTGTTAGA  |
| porcine-HU6s-F | CGCTTCGGCAGCACATATAC         |
| porcine-HU6s-R | TTCACGAATTTGCGTGTCATC        |
| porcine-s14-F  | ATCTGCAACCTATACCACAGC        |
| porcine-s14-R  | CCGACTAGGAACCATGAGATTG       |
| porcine-HU6s-R | TTCACGAATTTGCGTGTCATC        |
| porcine-s14-F  | ATCTGCAACCTATACCACAGC        |
| porcine-s14-R  | CCGACTAGGAACCATGAGATTG       |
