# Supplementary material for: Porcine cis-acting lnc-CAST positively regulates CXCL8 expression through histone H3K27ac
Source: Springer Nature journal article supplement (doi:10.1186/s13567-024-01296-9), 2024-05-07
Supplement: MOESM2 [file 13567_2024_1296_MOESM2_ESM.pdf]

---

| <b>Primer</b>             | <b>Sequence (5'-3')</b>    |
|---------------------------|----------------------------|
| Porcine- $\beta$ -actin-F | CTTCCTGGGCATGGAGTCC        |
| Porcine- $\beta$ -actin-R | GGCGCGATGATCTTGATCTTC      |
| CXCL8-F                   | CCGTGTCAACATGACTTCCAA      |
| CXCL8-R                   | GCCTCACAGAGAGCTGCAGAA      |
| CAST-F                    | GCAAAAGGATGTTGGAAACCC      |
| CAST-R                    | TCTGCACCCACTTTTCCTTG       |
| CHIP-CXCL8-F-A            | GGTTGCGTAGTGTGGAATTTC      |
| CHIP-CXCL8-R-A            | GGGACTTGTGCTGGATGG         |
| CHIP-CXCL8-F-B            | GTAATTGTGCCATAAAAGAATAATCA |
| CHIP-CXCL8-R-B            | GCATTGAGCTTCTTACCTGATCTTTC |

---
