# Supplementary material for: Porcine cis-acting lnc-CAST positively regulates CXCL8 expression through histone H3K27ac
Source: Springer Nature journal article supplement (doi:10.1186/s13567-024-01296-9), 2024-05-07
Supplement: MOESM3 [file 13567_2024_1296_MOESM3_ESM.pdf]

---

| <b>Primer</b>           | <b>Sequence (5'-3')</b>                   |
|-------------------------|-------------------------------------------|
| CAST-Xho1-F             | CCGCTCGAGCATGTAAGTAATTTCAAAGTGAT          |
| CAST-Not1-R             | ATAGTTTAGCGGCCGCATAAGTGAATAAATTACACTTG    |
| pGL3-basic-F            | TAAGCTTGGCATTCCGGTACTGTTG                 |
| pGL3-basic-R            | CCGGGCTAGCACGCGTAAGAGCTCG                 |
| CXCL8-promoter-F (-493) | TACGCGTGCTAGCCCGGGTAATTGTGCCATAAAAGAATAAT |
| CXCL8- promoter-R (+59) | CCGGAATGCCAAGCTTACAGAGAGCTGCAGAAAGCAG     |

---
