# Supplementary material for: Porcine cis-acting lnc-CAST positively regulates CXCL8 expression through histone H3K27ac
Source: Springer Nature journal article supplement (doi:10.1186/s13567-024-01296-9), 2024-05-07

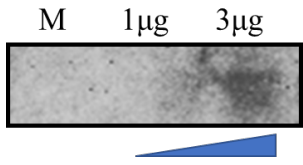

Supplement: MOESM5 [file 13567_2024_1296_MOESM5_ESM.pdf]
